# Supplementary material for: Human birth tissue products as a non-opioid medicine to inhibit post-surgical pain
Source: PubMed Central journal article supplement — bioRxiv. 2024 Sep 19:2024.05.19.594874. Originally published 2024 May 20. Preprint. [Version 4] doi: 10.1101/2024.05.19.594874 (PMC11142121; doi:10.1101/2024.05.19.594874), 2024-09-19
Supplement: NIHPP2024.05.19.594874v1-supplement-1.pdf [file NIHPP2024.05.19.594874v1-supplement-1.pdf]

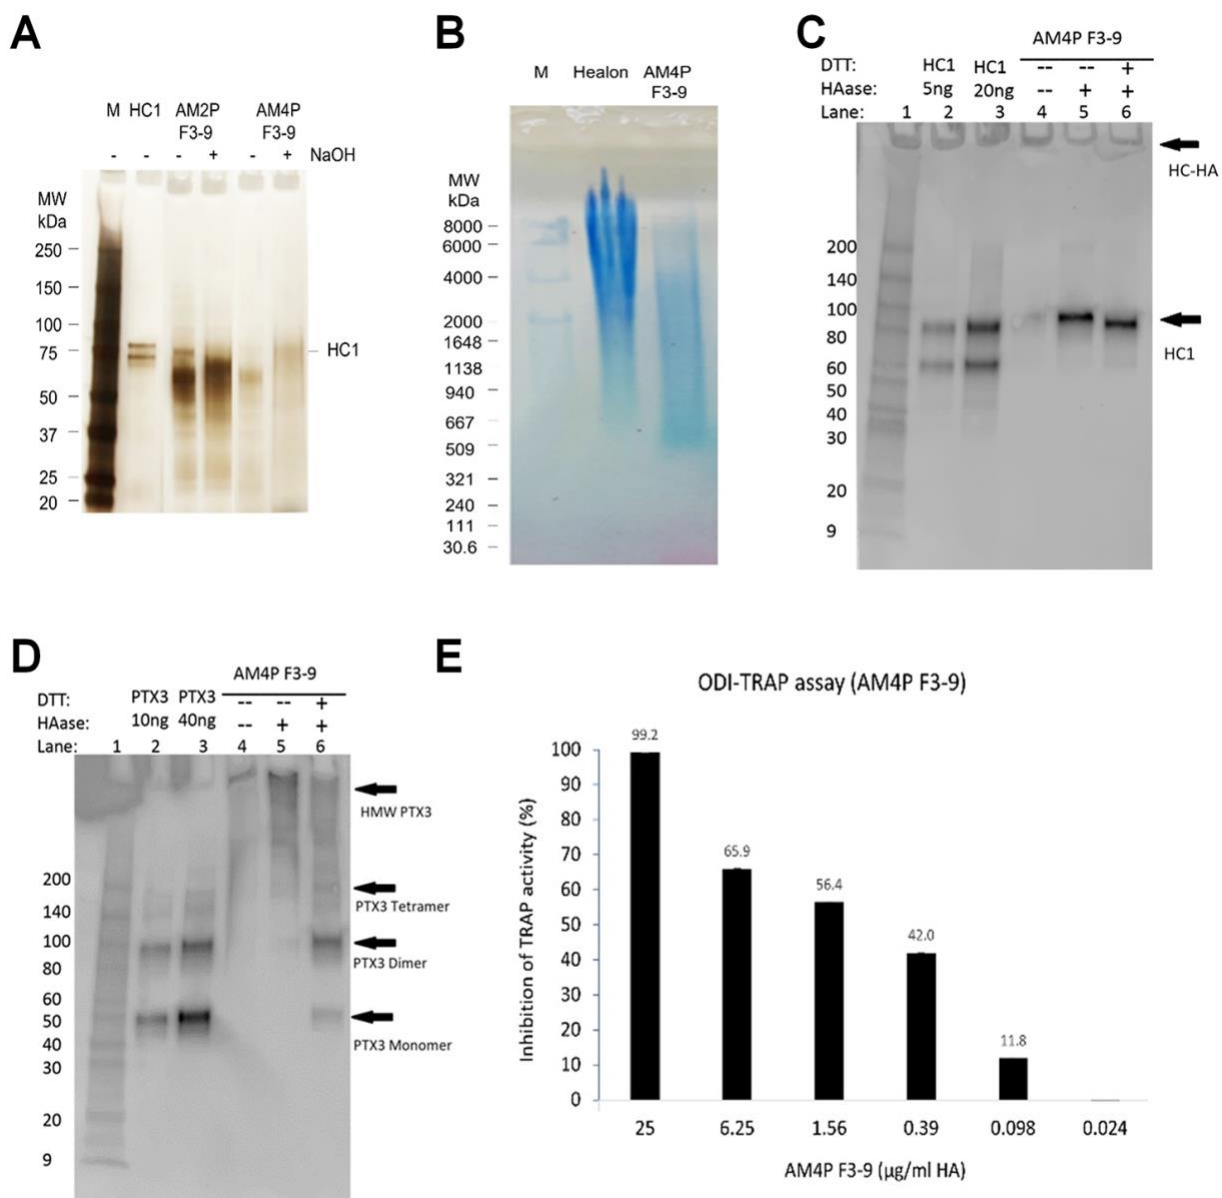

**Fig. S1. Purification and characterization of HC-HA/PTX3.**

(A) HC-HA/PTX3 was prepared from the human amniotic membrane by 2 runs (AM2P F3-9) or 4 runs (AM4P F3-9) of CsCl/4 M GnHCl ultracentrifugation and was then analyzed by silver staining. Each lane was loaded with 0.25 µg of HA without or with 100 mM NaOH treatment (25°C, 1 h) to cleave the bond between HA and HC1. (B) HC-HA/PTX3 (AM4P F3-9) purified from the amniotic membrane was electrophoresed on 0.5% agarose gel and stained with All-stains dye. Healon as a high-molecular-weight (HMW) HA control and HC-HA/PTX3 were loaded at 10 µg HA/lane; M: HA molecular weight ladder. (C-D) HC1 and PTX3 in HC-HA/PTX3 were detected by western blot using respective antibodies without (-) or with (+) hyaluronidase (HAase) treatment to release HC1 or HMW-PTX3, of which the latter can then be resolved into dimer or monomer without (-) or with (+) reduction with DTT. (E) Cloned murine RAW264.7

monocytes were seeded at  $1 \times 10^4$  cells/cm<sup>2</sup> in MEM  $\alpha$ /10% FBS and differentiated into multi-nucleated osteoclasts with 25 ng/ml RANKL as the positive control and treated with HC-HA/PTX3 at different concentrations (0.024 – 25  $\mu$ g/mL) for 3 days. The inhibition of TRAP activity in cell lysates was calculated as a percentage (%) of that of the positive control (shown on the top of each bar).

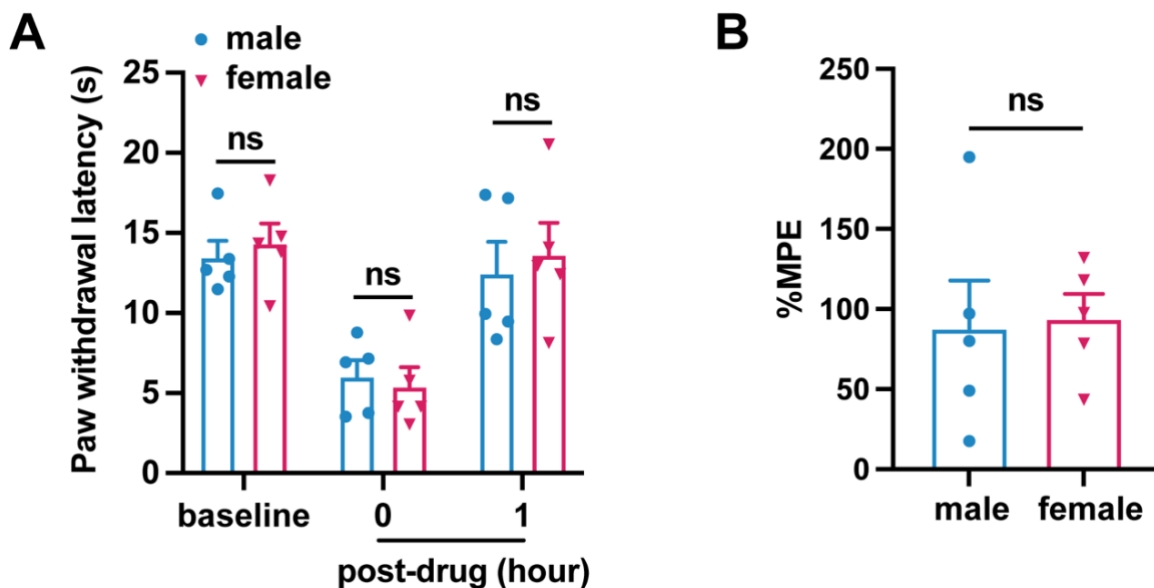

**Fig. S2. HC-HA/PTX3 induced comparable inhibition of heat hyperalgesia in male and female mice after plantar incision.**

(A) Paw withdrawal latency at different time point of male and female mice included in Figure 3B. (N= 5/sex) (B) The percentage of maximal possible effects (%MPE) at 1 hour post-drug were calculated for male and female mice included in Figure 3B.  $\%MPE = 1 - (\text{baseline} - \text{post-drug}) / (\text{baseline} - \text{pre-drug})$ . Data are mean  $\pm$  SEM. (A) Two-way mixed model ANOVA followed by Bonferroni post hoc test. \*P<0.05 versus male. (B) Unpaired t-test.

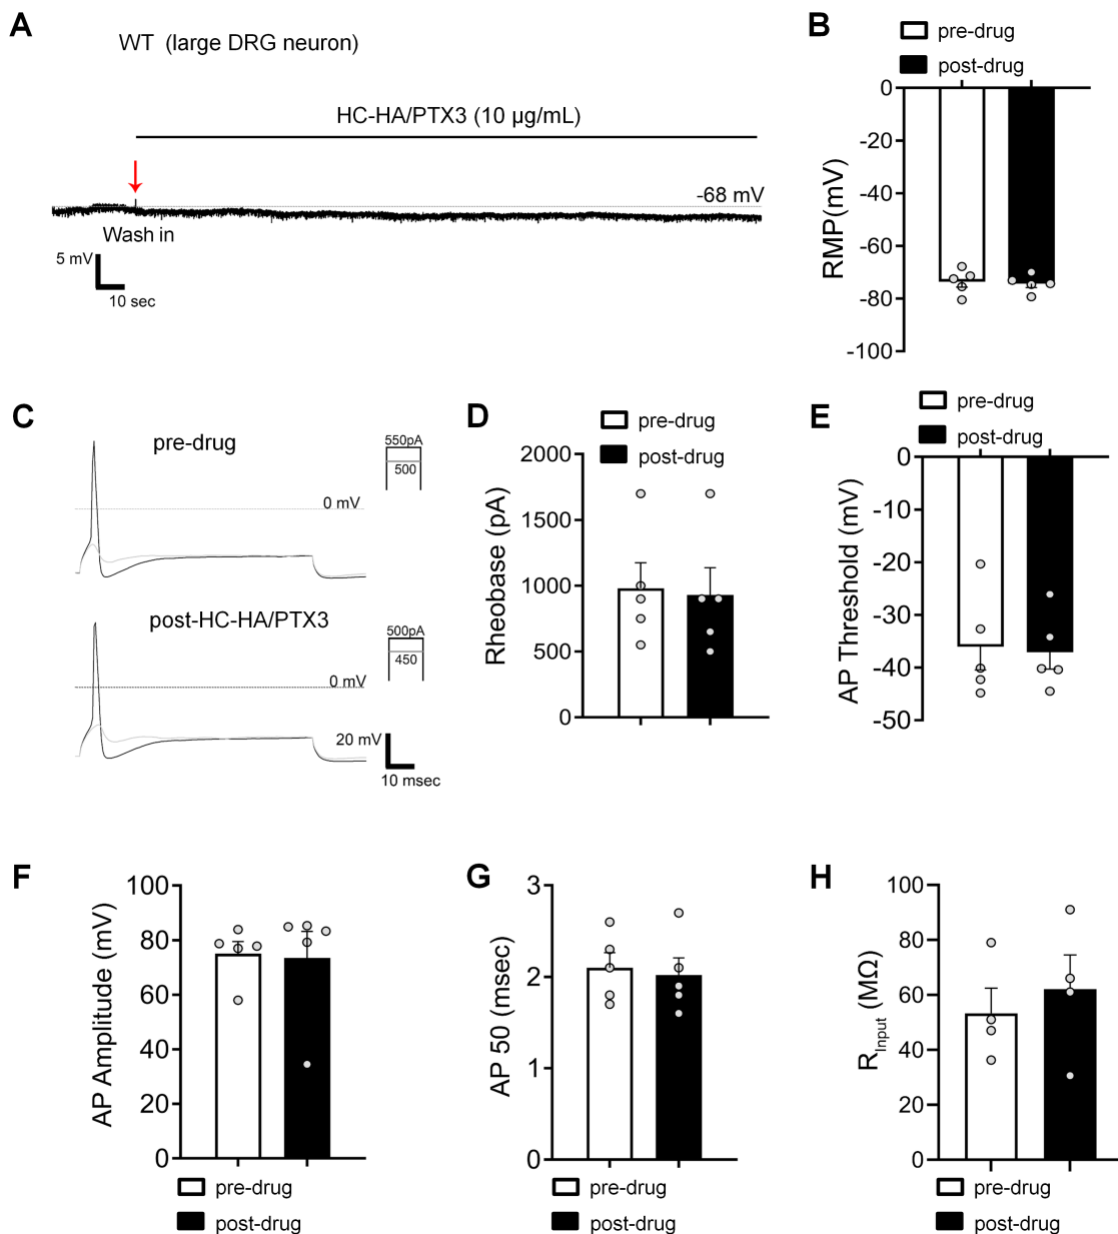

**Fig. S3. HC-HA/PTX3 did not affect the excitability of large-diameter DRG neurons in wild-type (WT) mice after the plantar incision.**

(A) The representative trace of membrane potential recorded under current-clamp conditions before and after HC-HA/PTX3 (15  $\mu\text{g/mL}$ ) treatment in a large DRG neuron of WT mice. Neurons were categorized according to cell body diameter as  $<20\ \mu\text{m}$  (small),  $20\text{--}30\ \mu\text{m}$  (medium), and  $>30\ \mu\text{m}$  (large). (B) The resting membrane potential (RMP) in large DRG neurons was not significantly changed at 5 min after HC-HA/PTX3 (10  $\mu\text{g/mL}$ ) treatment, compared to pre-drug ( $P=0.41$ ).  $N=5$ . (C) Representative traces of rheobase measurements before and after HC-HA/PTX3 (10  $\mu\text{g/mL}$ ). (D-H) Quantification of the rheobase (D,  $P=0.09$ ), action potential (AP) threshold (E,  $P=0.78$ ), AP amplitude (F,  $P=0.8$ ), AP duration (G,  $P=0.41$ ), and the mean input resistance ( $R_{input}$ , H,  $P=0.17$ ) before and at 5 min after HC-HA/PTX3 (10  $\mu\text{g/mL}$ ) treatment.  $N=5$ . Data are

presented as mean  $\pm$  SEM. (B, D-H) Paired t-test.

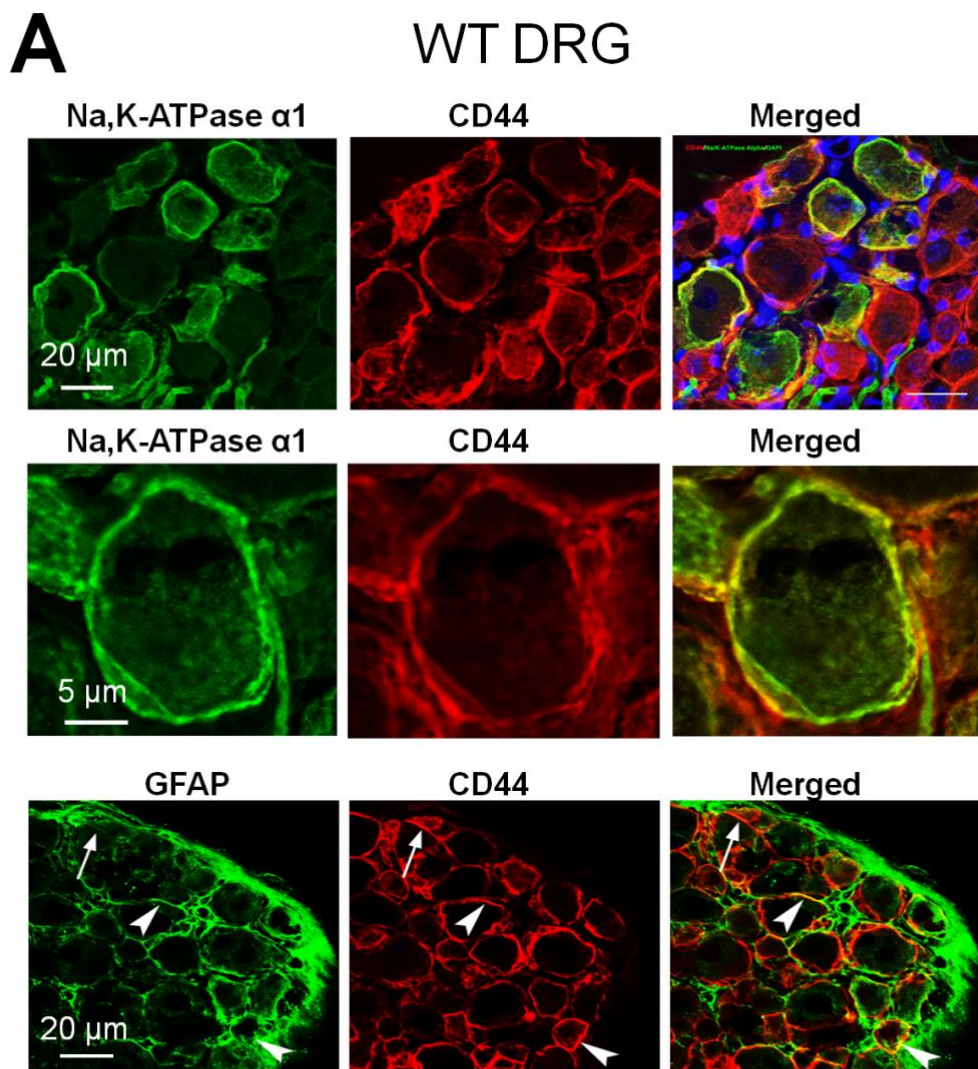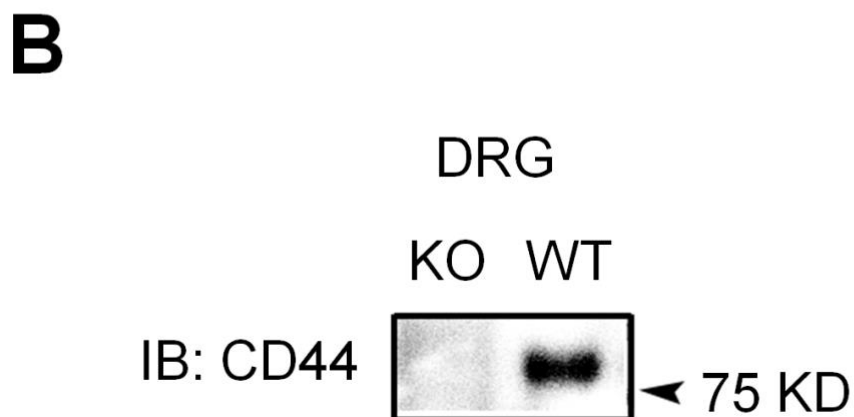

**Fig. S4. The expression of CD44 in mouse DRG.**

(A) Upper: Colocalization of CD44 and Na, K-ATPase alpha1 (a neuronal marker) immunoreactivity (IR) in wild-type (WT) mouse DRG. Blue: DAPI. Middle: A higher power view of CD44 and Na, K-ATPase alpha1 colocalization. Lower: Colocalization of CD44 and GFAP (a satellite glial cell marker) in DRG. Arrow: single-labeled cell; Arrowhead: double-labeled cell. (B) The specific CD44 band was not observed in the protein extracts derived from DRG tissues of CD44 knockout (KO) mice in the western blot study.

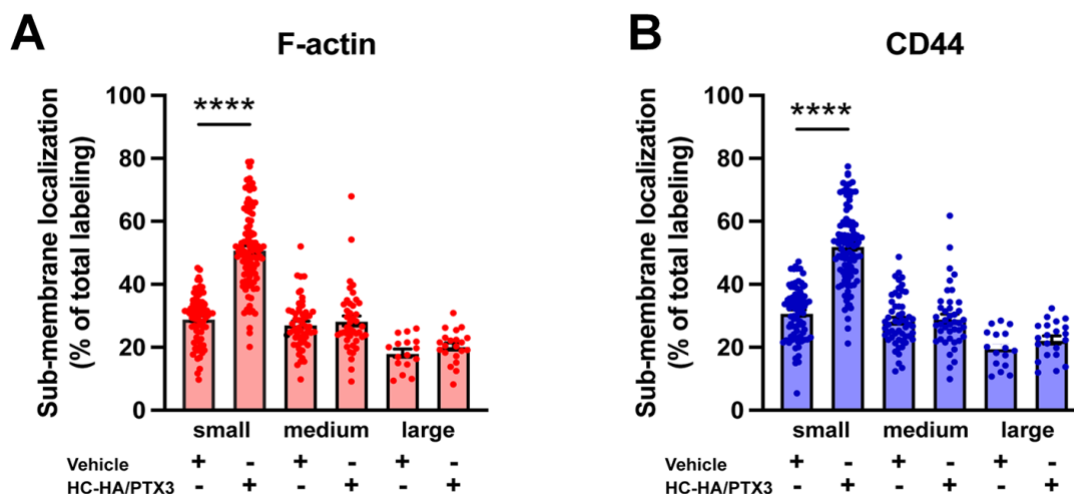

**Fig. S5. Differential effects of HC-HA/PTX3 on sub-membranous F-actin polymerization and translocation of CD44 in small-, medium-, and large-diameter wild-type (WT) DRG neurons.**

(A) Quantification of sub-membranous F-actin polymerization and (B) translocation of CD44 in different sizes of WT DRG neurons after HC-HA/PTX3 (10  $\mu\text{g}/\text{mL}$ ) or the vehicle (saline) treatment. DRG neurons were categorized according to cell body diameter as  $<20\ \mu\text{m}$  (small),  $20\text{--}30\ \mu\text{m}$  (medium), and  $>30\ \mu\text{m}$  (large). HC-HA/PTX3 increased sub-membranous F-actin polymerization and translocation of CD44 exclusively in small neurons.  $N=16\text{--}91/\text{group}$ . Data are mean  $\pm$  SEM. One-way ANOVA followed by Bonferroni post hoc test. \*\*\*\* $P < 0.0001$  versus vehicle.



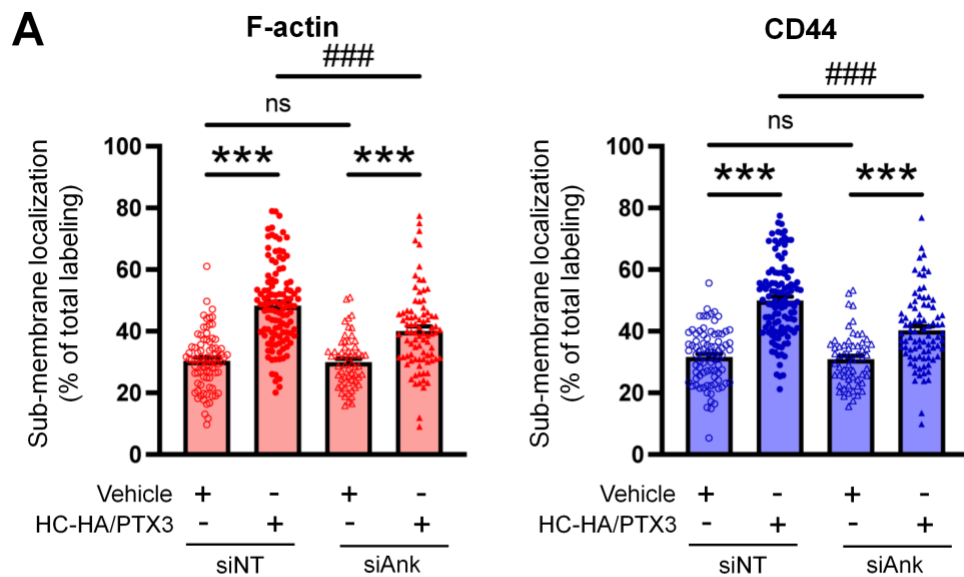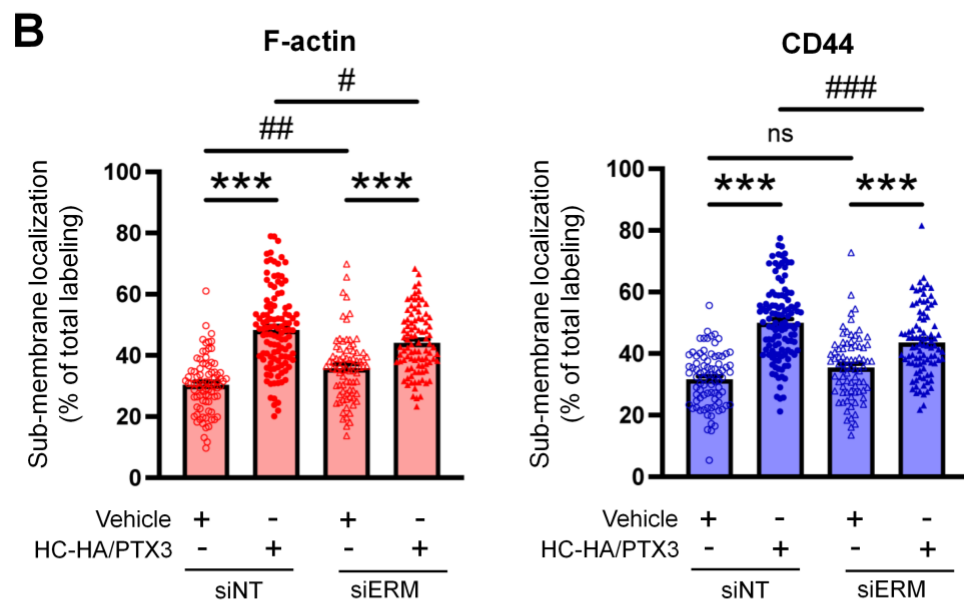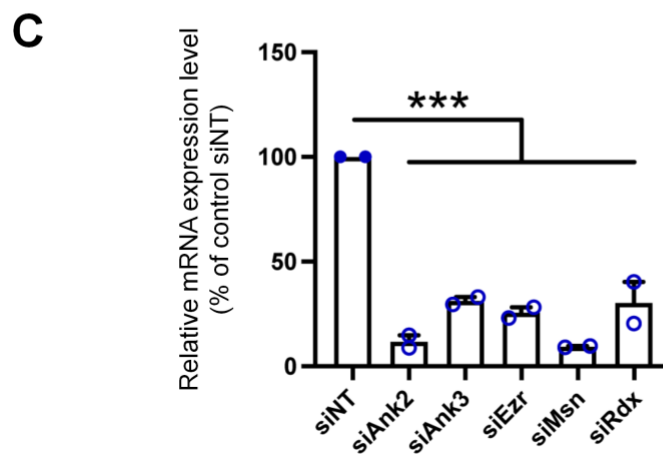

**Fig. S6. Quantification of submembranous F-actin polymerization and translocation of CD44 in small-diameter wild-type (WT) DRG neurons in each group.**

(A) DRG neurons were electroporated with siRNAs specifically targeting *Ank2* and *Ank3* (siAnk), (B) and those targeting *Ezr*, *Rdx*, and *Msn* (siERM) complex. Neurons were treated with a bath application of vehicle (saline) or HC-HA/PTX3 (10  $\mu$ g/mL) for 45 min. N=59-114/group. (C) The mRNA expression of *Ank2*, *Ank3*, *Ezr*, *Msn*, and *Rdx* in DRG neurons electroporated with specific siRNAs were assayed by qPCR. N=2. Data are mean  $\pm$  SEM. One-way ANOVA followed by Bonferroni post hoc test. \*\*\*P<0.001 versus vehicle; ####P<0.001 versus indicated group.

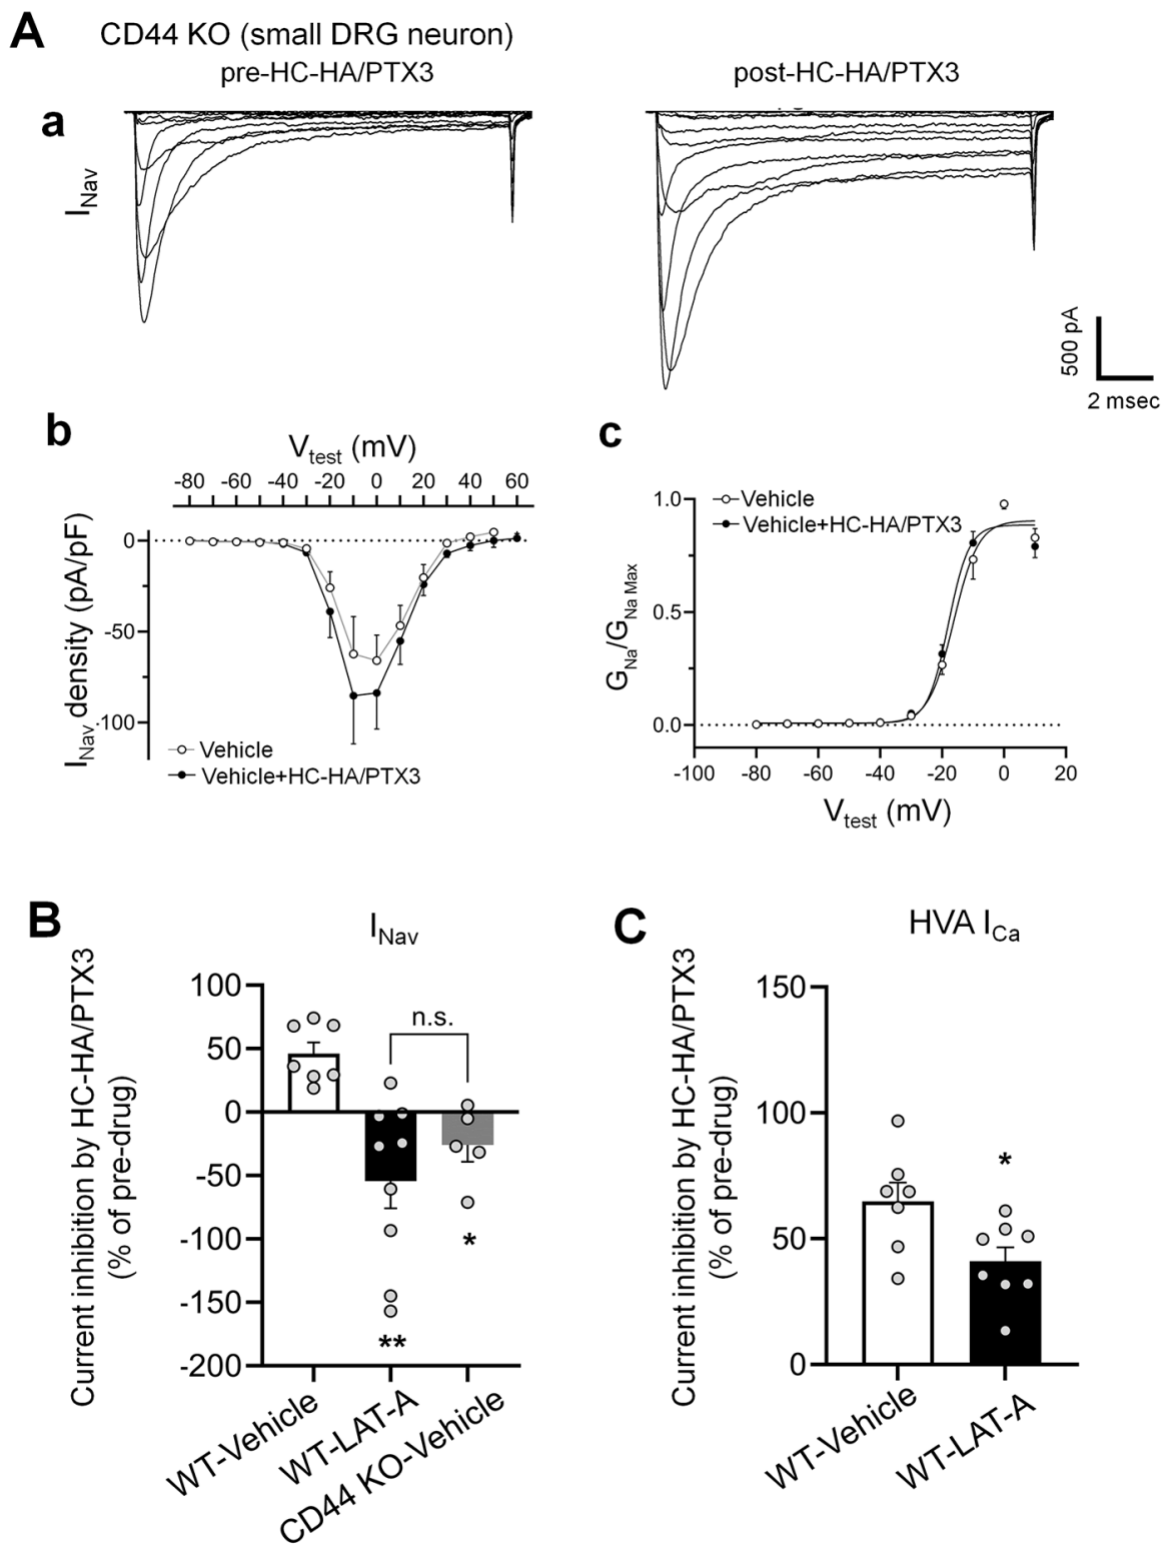

**Fig. S7. The inhibitions of  $I_{Nav}$  by HC-HA/PTX3 in small-diameter DRG neurons were diminished in CD44 KO mice and were inhibited by a pre-treatment of LAT-A**

**in neurons from WT mice.**

(A) HC-HA/PTX3 (10  $\mu\text{g/mL}$ ) did not inhibit  $I_{\text{Nav}}$  in small-diameter DRG neurons from CD44 KO mice. a. Representative traces of  $I_{\text{Nav}}$  in a CD44 KO neuron before and at 5 min after bath application of HC-HA/PTX3 (10  $\mu\text{g/mL}$ ). b. There was no significant change of  $I_{\text{Nav}}$  density (pA/pF) before and after HC-HA/PTX3 (10  $\mu\text{g/mL}$ ) treatment in CD44 KO neurons. c. HC-HA/PTX3 did not alter  $G_{\text{Na}}/G_{\text{Na max}}$  across the test voltages in CD44 KO neurons. N=5. (B) Changes of  $I_{\text{Nav}}$  after bath application of HC-HA/PTX3 (10  $\mu\text{g/mL}$ ) in vehicle-infused (N=7) and LAT-A-infused small WT DRG neurons ( $P < 0.01$ , N=9), and in vehicle-infused CD44 KO neurons (N=5). DRG neurons were infused with the vehicle or LAT-A (0.5 nM) through the recording electrode, followed by bath application of HC-HA/PTX3 (10  $\mu\text{g/mL}$ ) 5 min later. The lumbar DRG neurons were harvested on Days 2-3 after the plantar incision. DRG neurons were categorized according to cell body diameter as  $< 20 \mu\text{m}$  (small),  $20\text{--}30 \mu\text{m}$  (medium), and  $> 30 \mu\text{m}$  (large). Data are mean  $\pm$  SEM. One-way ANOVA with Holm-Sidak post-test. \* $P < 0.05$ , \*\* $P < 0.01$  versus WT-vehicle pretreatment group. (C) The inhibition of HVA  $I_{\text{Ca}}$  by HC-HA/PTX3 (10  $\mu\text{g/mL}$ ) in vehicle-infused (N=7) and LAT-A-infused small WT DRG neurons ( $P = 0.02$ , N=8). Data are mean  $\pm$  SEM. Unpaired Student's t-test.

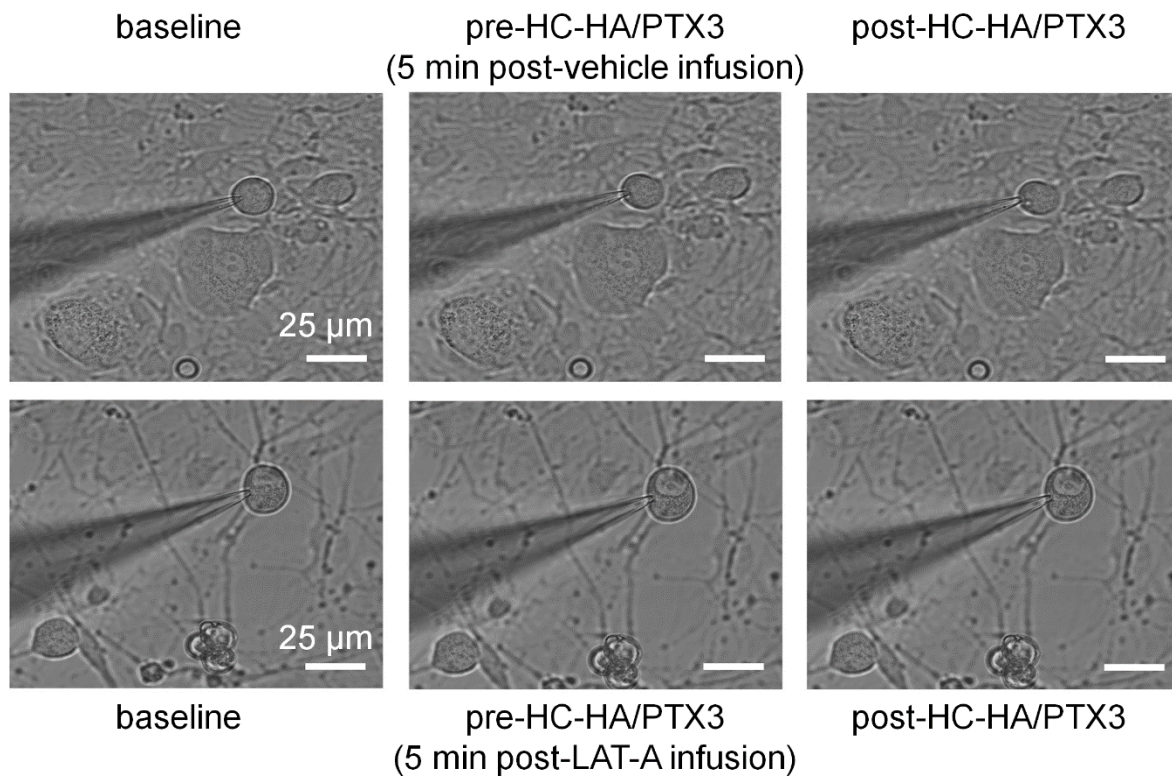

**Fig. S8. Intracellular infusion of LAT-A did not change the gross morphology of DRG neurons in patch clamp recordings.**

Example images show a small-diameter DRG neuron after infusion vehicle or Latrunculin A (LAT-A, 0.5 nM) through the recording electrode, followed by bath application of HC-HA/PTX3 (15 µg/mL). Scale bar: 25 µm. DRG neurons were categorized according to cell body diameter as <20 µm (small), 20–30 µm (medium), and >30 µm (large).

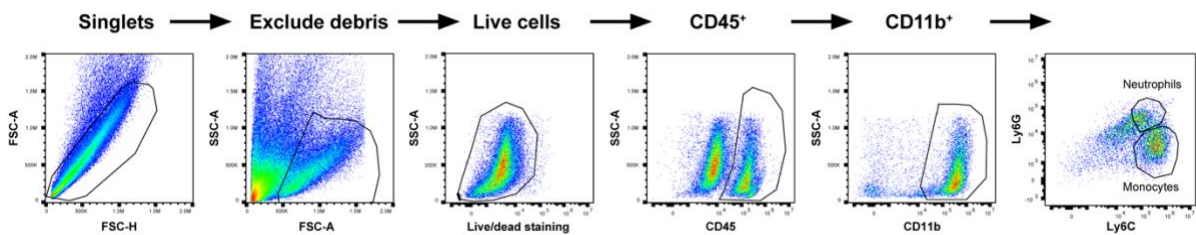

**Fig. S9. Representative flow cytometry gating strategy for identification of CD45<sup>+</sup> cells, CD11b<sup>+</sup>Ly6G<sup>+</sup> neutrophils, and CD11b<sup>+</sup>Ly6G<sup>-</sup>Ly6C<sup>+</sup> monocytes in wild-type mice hind paw skin after the plantar-incision.**

**Table S1. The measures of intrinsic membrane properties of small-diameter DRG neurons in WT and CD44 KO mice.**

Knocking out of CD44 did not significantly alter the intrinsic membrane property of DRG neurons, as compared to that in WT mice.

|                        | Wild Type     | CD44 <sup>-/-</sup> |                          | p-value |
|------------------------|---------------|---------------------|--------------------------|---------|
| V <sub>rest</sub> (mV) | -49.4 ± 1.4   | -48.77 ± 2.1        | t <sub>(21)</sub> = 0.76 | 0.81    |
| Rheobase (pA)          | 156.9 ± 14.1  | 154.2 ± 21.81       | t <sub>(22)</sub> = 0.1  | 0.92    |
| AP Threshold (mV)      | -32.76 ± 1.29 | -31.4 ± 1.22        | t <sub>(22)</sub> = 0.58 | 0.57    |
| AP Amplitude (mV)      | 70.27 ± 4.53  | 54.55 ± 8.73        | t <sub>(22)</sub> = 1.69 | 0.1     |
| AP50 (msecs)           | 8.85 ± 0.55   | 10.02 ± 1.27        | t <sub>(22)</sub> = 0.98 | 0.33    |
| Overshoot (mV)         | 37.26 ± 4.66  | 52.8 ± 6.15         | t <sub>(24)</sub> = 1.69 | 0.1     |
| AHP (mV)               | -65.47 ± 1.03 | -64.05 ± 1.13       | t <sub>(24)</sub> = 0.71 | 0.48    |
| τ-AHP (msecs)          | 70.98 ± 7.93  | 56.18 ± 8.63        | t <sub>(24)</sub> = 0.96 | 0.35    |
